# Supplementary material for: Continuous synthesis of ruthenium nanoparticles with tuneable sizes using ruthenium nitrosyl nitrate precursor
Source: Royal Society of Chemistry journal article supplement (doi:10.1039/d3re00585b), 2024-01-01
Supplement: d3re00585b1.pdf [file d3re00585b1.pdf]

# Continuous Synthesis of Ruthenium Nanoparticles with Tuneable Sizes using Ruthenium Nitrosyl Nitrate precursor

Joseph El-Kadi, Eugenio Fenoaltea Pieche, Seung Woo Ko, Laura Torrente-Murciano\*

Department of Chemical Engineering and Biotechnology, University of Cambridge, Philippa Fawcett Drive, CB3 0AS, Cambridge, UK

\*Corresponding author: [lt416@cam.ac.uk](mailto:lt416@cam.ac.uk)

## Supplementary information

Table S.1 TEM and DLS results of Ru NPs synthesised in flow and batch synthesis and collected in HNO<sub>3</sub>, BSA

| Synthesis type | Acid/Stabiliser  | Final pH with stabiliser | TEM results       |                         | DLS results                 |                         | ZP Results                  |                         |
|----------------|------------------|--------------------------|-------------------|-------------------------|-----------------------------|-------------------------|-----------------------------|-------------------------|
|                |                  |                          | Average size (nm) | Standard deviation (nm) | Average size by number (nm) | Standard deviation (nm) | Average Zeta Potential (mV) | Standard deviation (mV) |
| Batch          | HNO <sub>3</sub> | 1.2                      | 4.0               | 0.7                     | 7                           | 1                       | +37                         | 1                       |
| Flow           | HNO <sub>3</sub> | 1.2                      | 2.9               | 0.4                     | 15                          | 2                       | +32                         | 2                       |
|                | PVP              | 10.8                     | 3.4               | 0.6                     | 9                           | 3                       | -35                         | 2                       |
|                | BSA              | 10.6                     | 3.0               | 0.8                     | 13                          | 5                       | -39                         | 4                       |

and PVP post-synthesis.

Figure S.1: TEM images comparing batch and flow synthesis of Ru NPs collected in HNO<sub>3</sub>, BSA and PVP post-synthesis. (a) TEM image of nanoparticles synthesised in batch collected in HNO<sub>3</sub> (C<sub>f</sub> 0.1M). (b) TEM image of nanoparticles synthesised in flow and collected in HNO<sub>3</sub> (C<sub>f</sub> 0.1M) (c) in BSA (C<sub>f</sub> = 1 mg mL<sup>-1</sup>) and (d) in PVP (C<sub>f</sub> = 2mg mL<sup>-1</sup>) (e) Lattice fringes from flow-synthesised Ru NPs in HNO<sub>3</sub> showing spacing of 0.22 nm corresponding to hexagonal close-packed Ru(0).

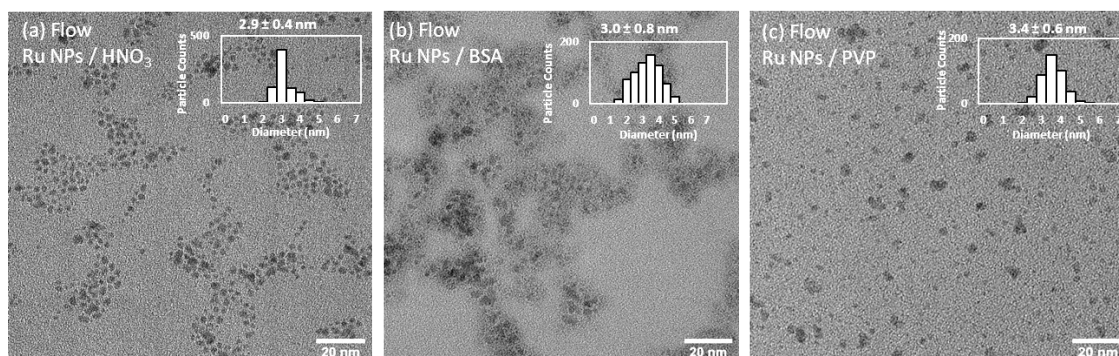

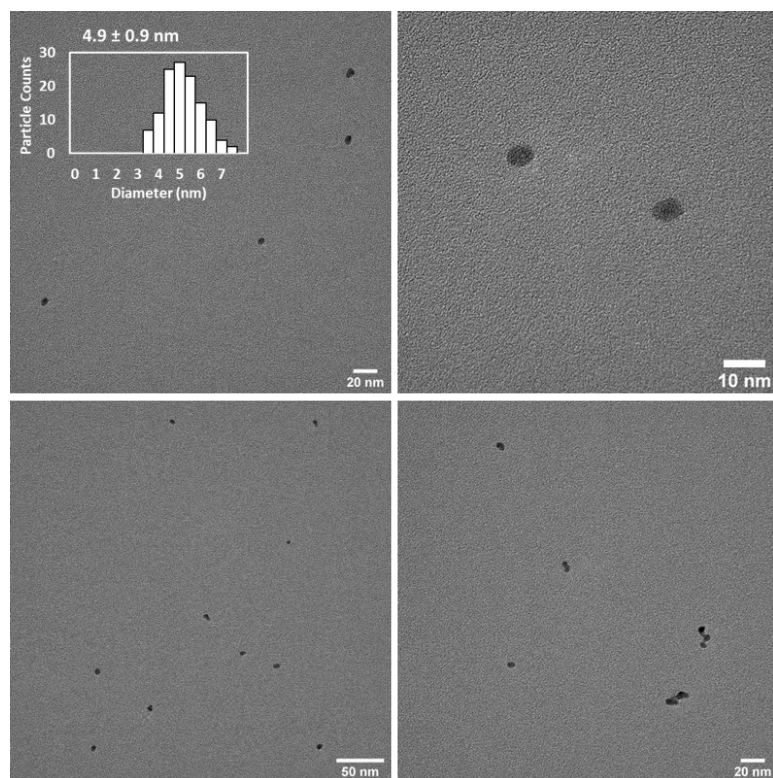

Figure S.2: Pd NPs synthesised in batch by mixing 2.5 mM of  $\text{K}_2[\text{Pd}(\text{NO})(\text{NO}_2)_4(\text{NO}_3)]$  (prepared from potassium tetranitropalladate as per *Griffith, Lewis and Wilkinson 1961*<sup>59</sup>) and 3 mM  $\text{NaBH}_4$  at 25°C.

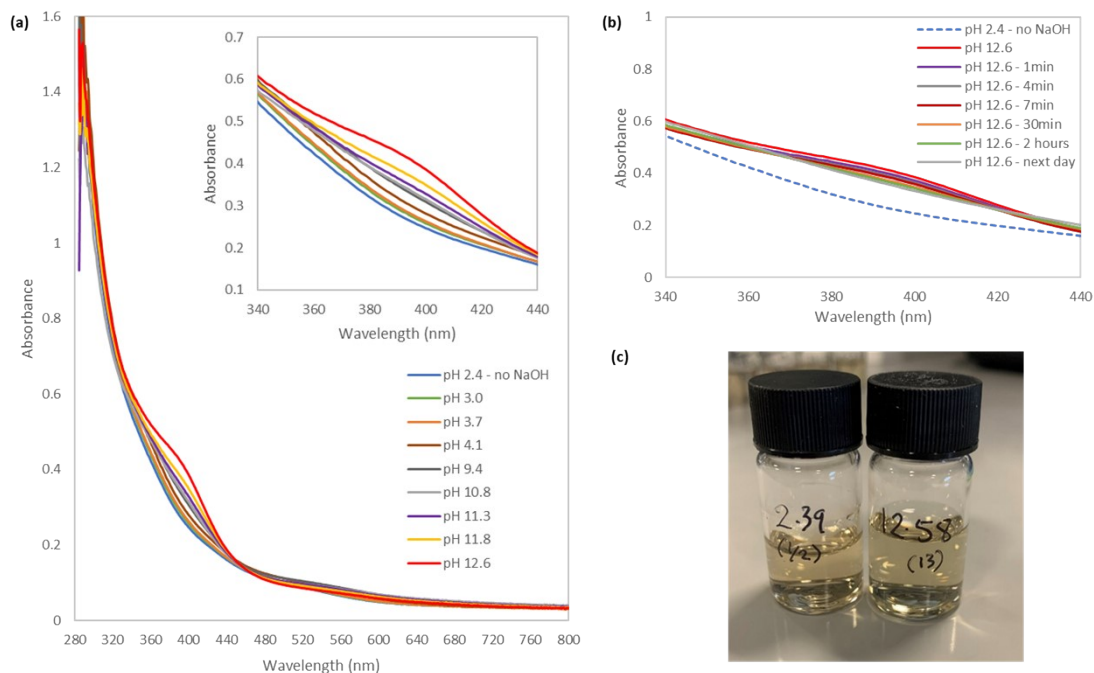

Figure S.3: Effect of pH on Ru precursor (a) UV-vis absorbance spectra for mixed solutions of 1.25 mM  $\text{Ru}(\text{NO})(\text{NO}_3)_3$  and NaOH at various final pH values, measured 10 seconds after mixing, from pH 2.4 (equivolume water addition in the absence of NaOH) to pH 12.6 (equivolume addition of 0.1 M NaOH) (b) relaxation of UV-vis shoulder for Ru solution with final pH 12.6 with time (c) Photo showing colours of Ru

solutions of final pH 2.4 and 12.6, taken 30 mins after conducting experiments. DLS measurements show no particles present.

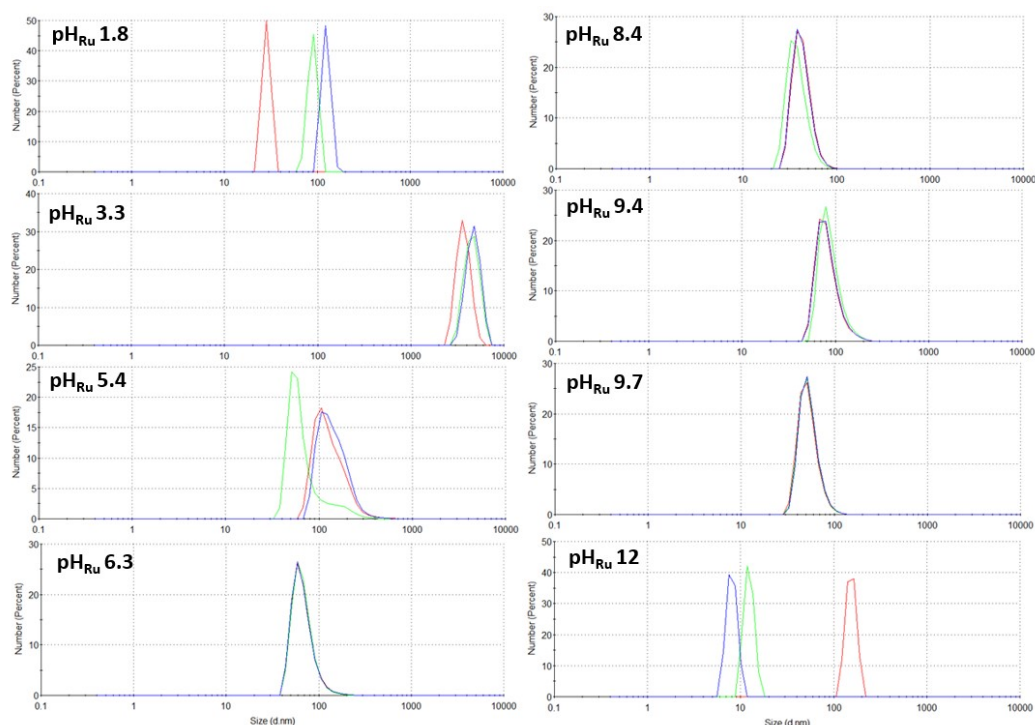

Figure S.4: Effect of pH on  $\text{Ru}(\text{NO})(\text{NO}_3)_3$  reducibility. DLS number size distribution plots for mixed solutions of 2.5 mM  $\text{Ru}(\text{NO})(\text{NO}_3)_3$  of varied starting pH values ( $\text{pH}_{\text{Ru}}$ ) and 6.25 mM  $\text{NaBH}_4$ , measurements were conducted after 30 mins of mixing at 25°C. Repeatable results are observed only for solutions with  $\text{pH}_{\text{Ru}}$

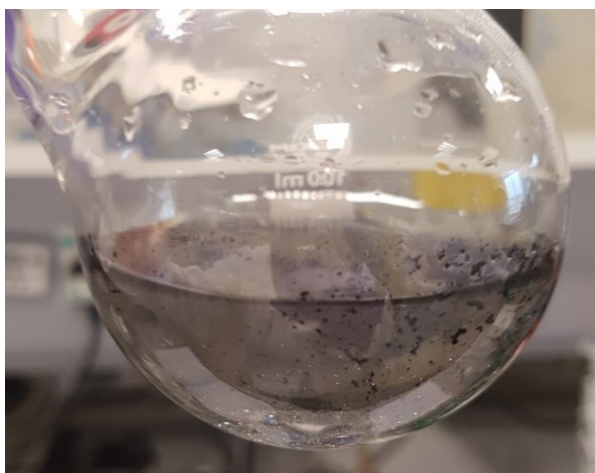

between 6.3-9.7.

Figure S.5: Evident precipitation during the reduction of  $\text{RuCl}_3$  (2 mM, 40 mL) to form Ru NPs by dropwise addition of *powder-derived*  $\text{NaBH}_4$  solution (0.1 M, 1.5 mL) at 0.2 ml/min.

**Table S.2: Batch experiments with  $\text{RuCl}_3$  (2 mM, 40 mL) with 8.5 mL of HCl of different concentrations, to which 1.5 mL of  $\text{NaBH}_4$  was added either in one shot or dropwise, producing large DLS sizes and significant agglomeration after 24 h.**

| Concentration before mixing (mM) |                 |     | $\text{NaBH}_4$ addition | Final concentration (mM) |                 |      | Molar Ratio               |                            | Final pH | DLS average size by number (nm) |
|----------------------------------|-----------------|-----|--------------------------|--------------------------|-----------------|------|---------------------------|----------------------------|----------|---------------------------------|
| $\text{RuCl}_3$                  | $\text{NaBH}_4$ | HCl |                          | $\text{RuCl}_3$          | $\text{NaBH}_4$ | HCl  | $\text{NaBH}_4:\text{Ru}$ | $\text{HCl}:\text{NaBH}_4$ |          |                                 |
| 2.00                             | 100             | 35  | One shot                 | 1.6                      | 3               | 5.95 | 1.88                      | 2.0                        | 1.90     | 152                             |
| 2.00                             | 800             | 140 | One shot                 | 1.6                      | 24              | 23.8 | 15.0                      | 1.0                        | 2.42     | 345                             |
| 2.00                             | 100             | 35  | 0.3 ml/min               | 1.6                      | 3               | 5.95 | 1.88                      | 2.0                        | 1.87     | 184                             |
| 2.00                             | 800             | 140 | 0.3 ml/min               | 1.6                      | 24              | 23.8 | 15.0                      | 1.0                        | 1.92     | 252                             |

**Table S.3: TEM, DLS and Zeta Potential results of  $\text{HNO}_3$  stabilised Ru NPs from various size control experiments, Table 3.**

| Experiment | TEM results       |                         |                             | DLS results                 |                         |                      | ZP results                  |                         |
|------------|-------------------|-------------------------|-----------------------------|-----------------------------|-------------------------|----------------------|-----------------------------|-------------------------|
|            | Average size (nm) | Standard deviation (nm) | Number of particles counted | Average size by number (nm) | Standard deviation (nm) | Mean Count Rate (Hz) | Average Zeta Potential (mV) | Standard deviation (mV) |
| 1          | 2.9               | 0.4                     | 805                         |                             |                         |                      |                             |                         |
| 2          | 3.9               | 0.5                     | 531                         |                             |                         |                      |                             |                         |
| 3          | 4.0               | 1.4                     | 243                         |                             |                         |                      |                             |                         |
| 4          | 2.1               | 0.3                     | 320                         |                             |                         |                      |                             |                         |
| 5          | 3.2               | 0.4                     | 324                         |                             |                         |                      |                             |                         |
| 6          | 3.0               | 0.5                     | 563                         |                             |                         |                      |                             |                         |

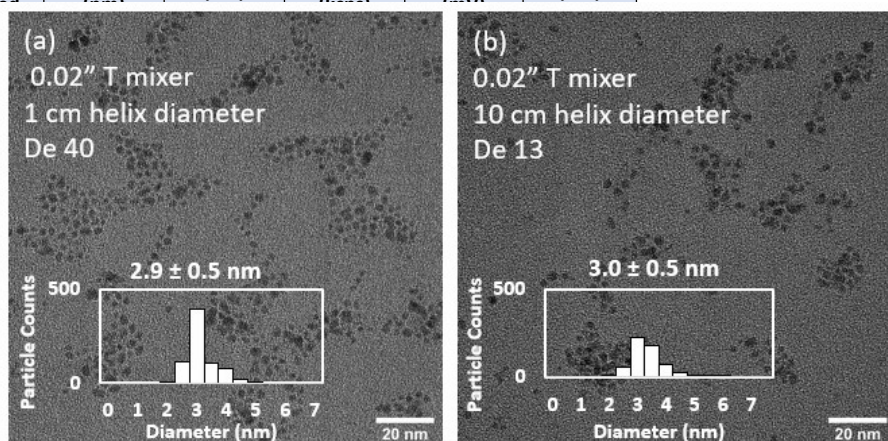

**Figure S.6 Effect of reactor helix diameter on the size and distribution of continuously synthesised Ru NPs. Representative TEM images. Experiments 1 and 6, Table 3.**
